# Supplementary material
Source: PubMed Central journal article supplement (PMC4403235)
Supplement: Supp_Data.pdf [file Supp_Data.pdf]

## Supplementary Data

### Supplementary Materials and Methods

#### *V.G staining of histopathological changes in nude mice skin caused by dedifferentiated adipocytes*

The slices of nude mice skin after subcutaneous injection of one milliliter of hydrogel with dedifferentiated adipocytes (DAs,  $10^5$  cells/1 mL) also underwent V.G staining to verify the results of Masson trichrome staining, using a V.G staining kit (Rongbai Biotechnology). The pictures were taken under  $\times 200$  magnification. The V.G staining positive areas were analyzed by ImageJ by a blinded observer and the average percentage of stained area was calculated.

#### *Immunofluorescent staining for $\gamma$ H2AX in UVB-irradiated human dermal fibroblasts*

Two groups of human dermal fibroblasts (HDFs) were irradiated by single dosage of  $30 \text{ mJ/cm}^2$  ultraviolet B (UVB), one

with added  $3 \text{ ng/mL}$  transforming growth factor- $\beta_1$  (TGF- $\beta_1$ ; Abcam). After 0, 8, and 24 h, the cells were fixed in 3.7% formaldehyde for 10 min, and then in ice-cold methanol for 5 min. They were then incubated with 1:100 diluted rabbit anti-gamma H2AX (phospho S139) antibody (Abcam) in phosphate-buffered saline (PBS) overnight at  $4^\circ\text{C}$ , rinsed, and incubated with 1:1,000 diluted goat anti-rabbit-FITC (KLP) in PBS at room temperature for 30 min. The DNA was stained with DAPI. Cells were observed under a confocal fluorescent microscope. The percentages of positive staining cells were calculated.

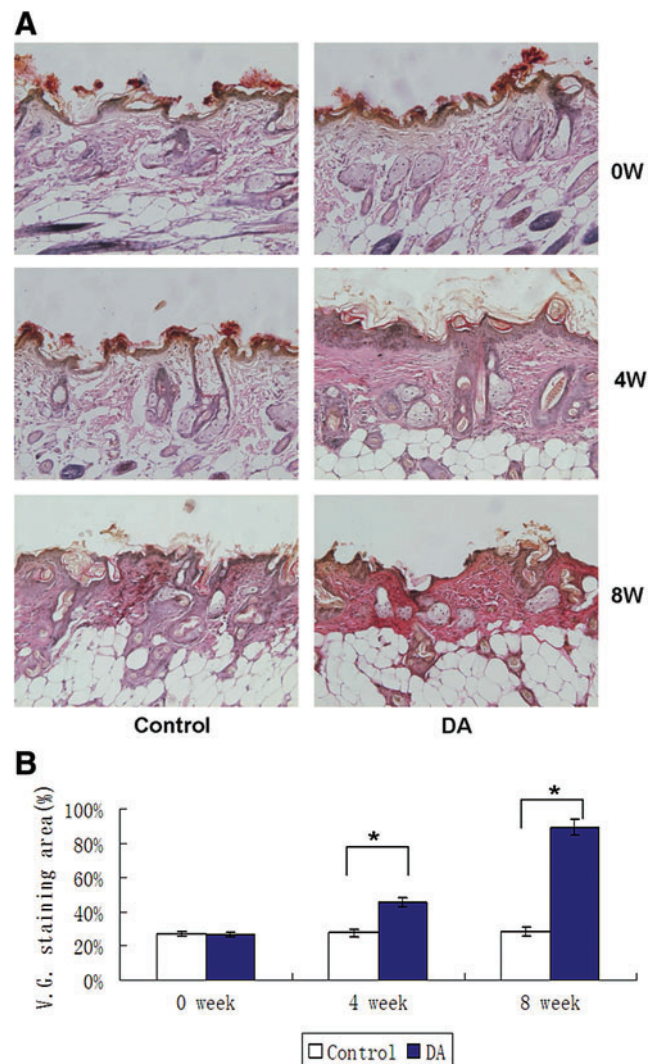

**SUPPLEMENTARY FIG. S1.** Subcutaneous injection of DAs improves the density and arrangement of collagen fibers in the dermis of nude mice skin (A, V.G staining,  $\times 200$ ). The V.G staining positive areas were analyzed by ImageJ and the average percentage of stained area was calculated (B). \* $P < 0.05$ . DAs, dedifferentiated adipocytes.

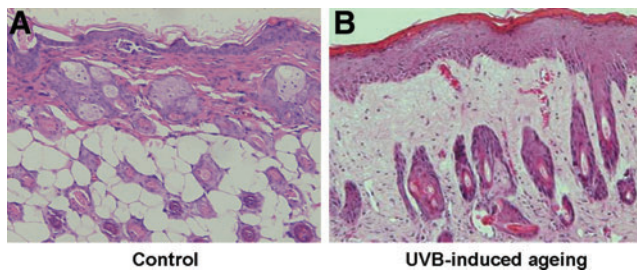

**SUPPLEMENTARY FIG. S2.** Histological changes in UVB-induced photoaged mice skin (**B**) vs. Control (**A**) (hematoxylin and eosin staining,  $\times 200$ ). UVB, ultraviolet B.

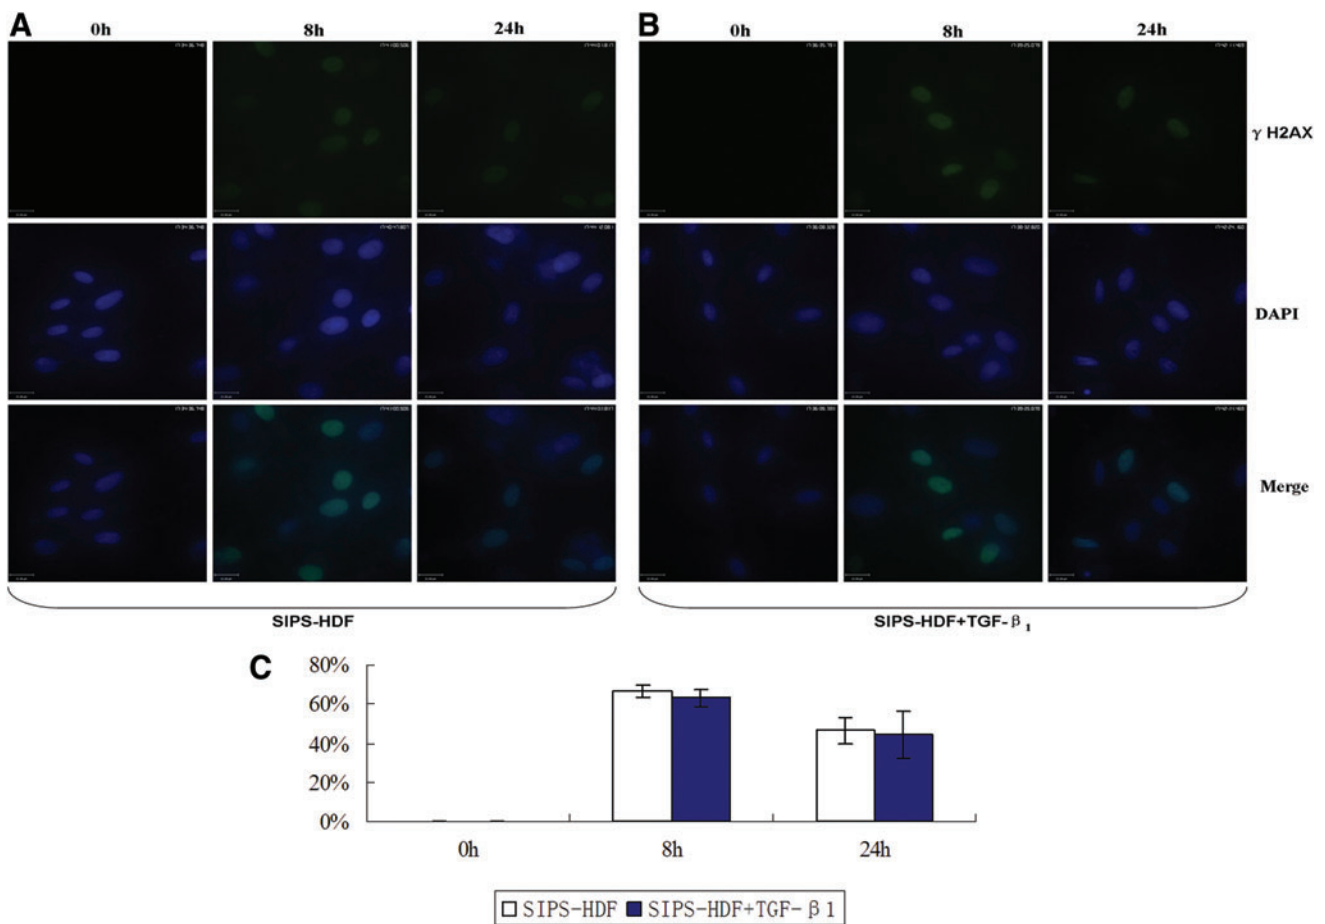

**SUPPLEMENTARY FIG. S3.** TGF- $\beta$ <sub>1</sub> exhibits no influence on UVB-induced DNA damage in HDFs. HDFs were irradiated by 30 mJ/cm<sup>2</sup> UVB, with one group with added 3 ng/mL TGF- $\beta$ <sub>1</sub>. The percentages of positive immunofluorescent staining cells for  $\gamma$ H2AX were counted after 0, 8, and 24 h (**A** and **B**). Cell nuclei were counterstained by DAPI. No significant difference was found between the two groups at different time points (**C**). Data are mean  $\pm$  SD,  $n=3$ . HDFs, human dermal fibroblasts; TGF- $\beta$ <sub>1</sub>, transforming growth factor- $\beta$ <sub>1</sub>.
